# Supplementary figures and images for: Naringin regulates intestinal microorganisms and serum metabolites to promote spermatogenesis
Source: Royal Society of Chemistry journal article supplement (doi:10.1039/d3fo00123g), 2023-01-01

Figure .S1

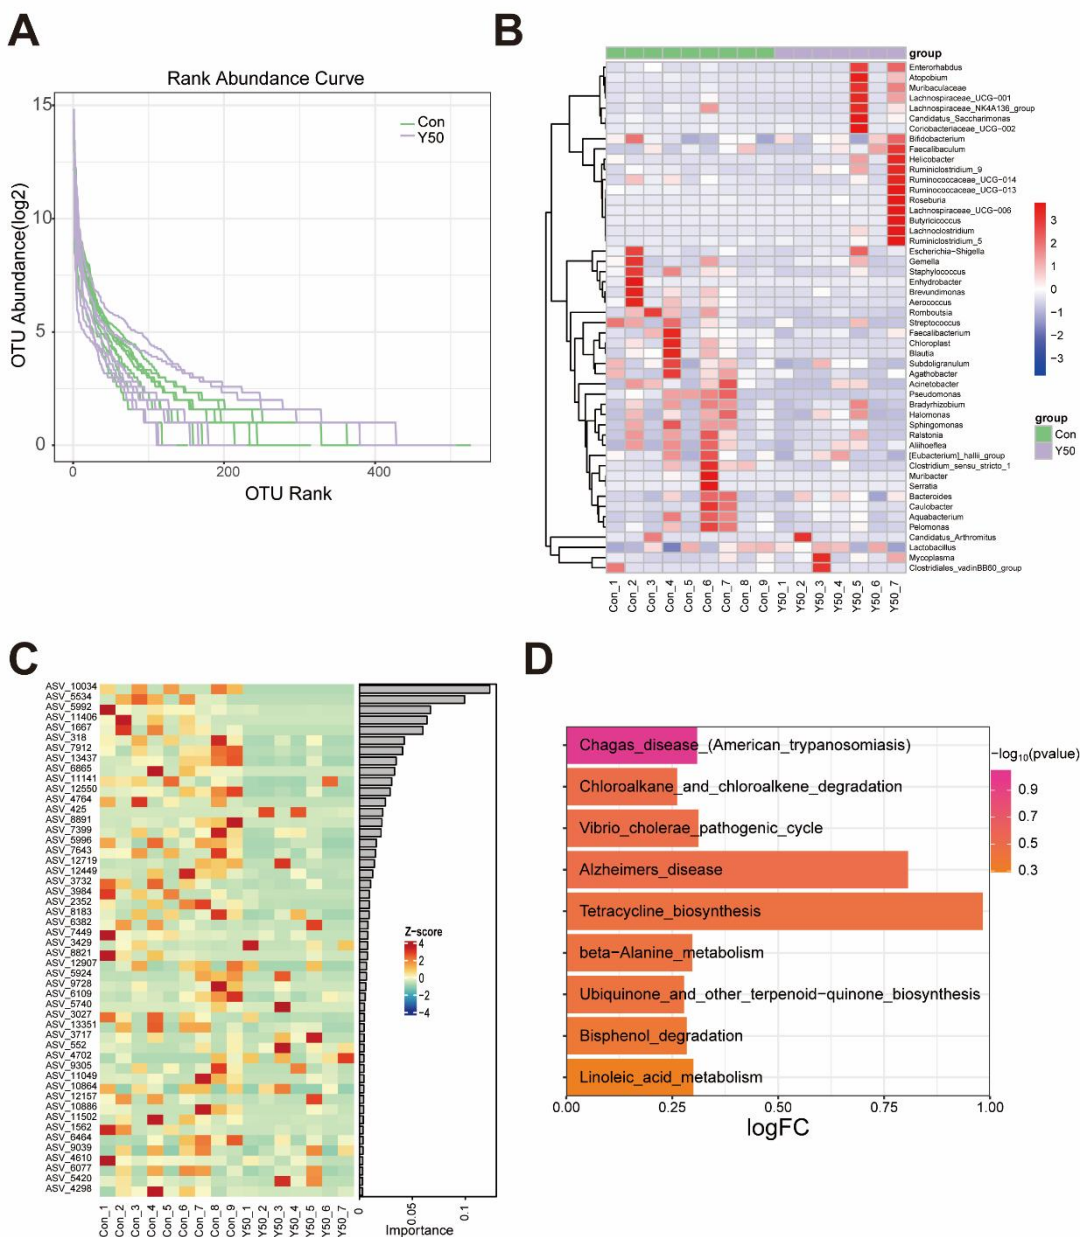

# Figure .S2

## A

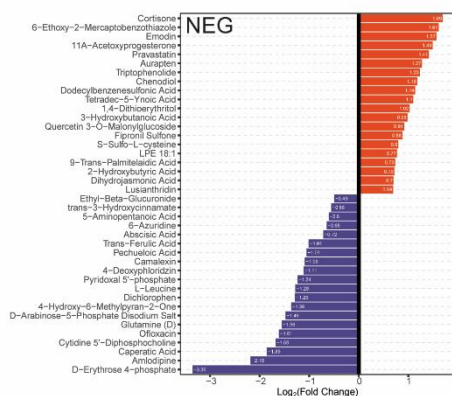

## B

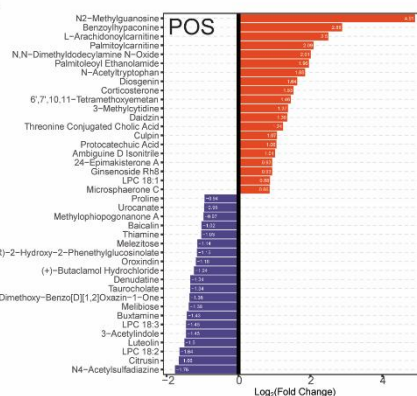

## C

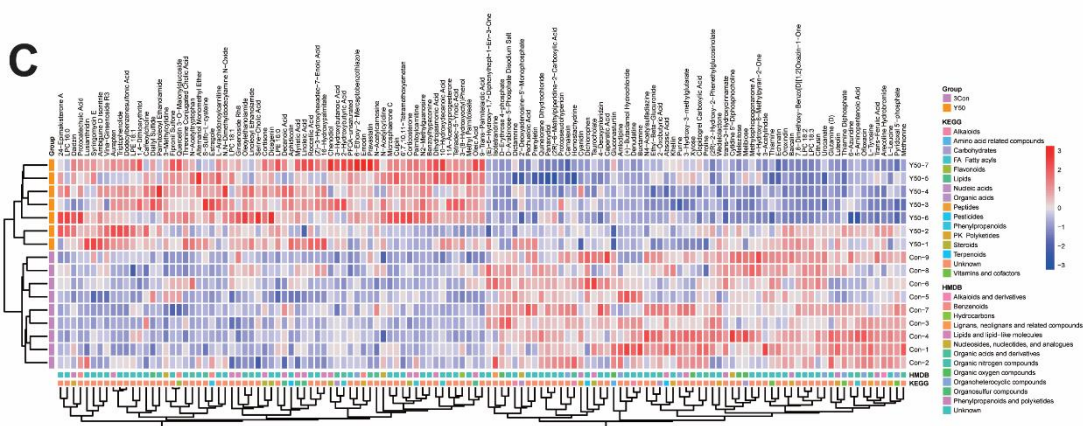

## D

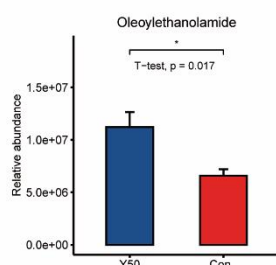

## F

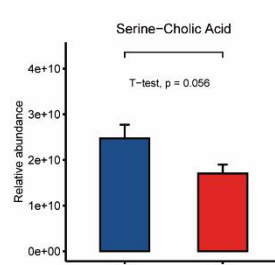

## E

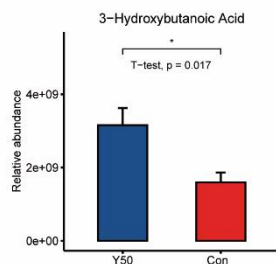

## G

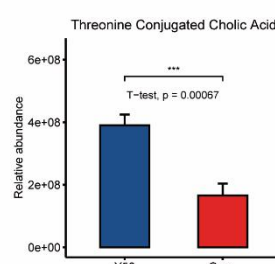

Supplement: d3fo00123g2.pdf [file d3fo00123g2.pdf]
